# Supplementary material for: High-selectivity turn-on fluorescence-based fluoride ion detection using histidine-functionalized UiO-66-NH2
Source: Royal Society of Chemistry journal article supplement (doi:10.1039/d4ra04169k), 2024-01-01
Supplement: d4ra04169k1.pdf [file d4ra04169k1.pdf]

## High Selectivity Turn-ON Fluorescence Based Fluoride Ion Detection Using Histidine functionalized UiO-66-NH<sub>2</sub>

### Supporting information

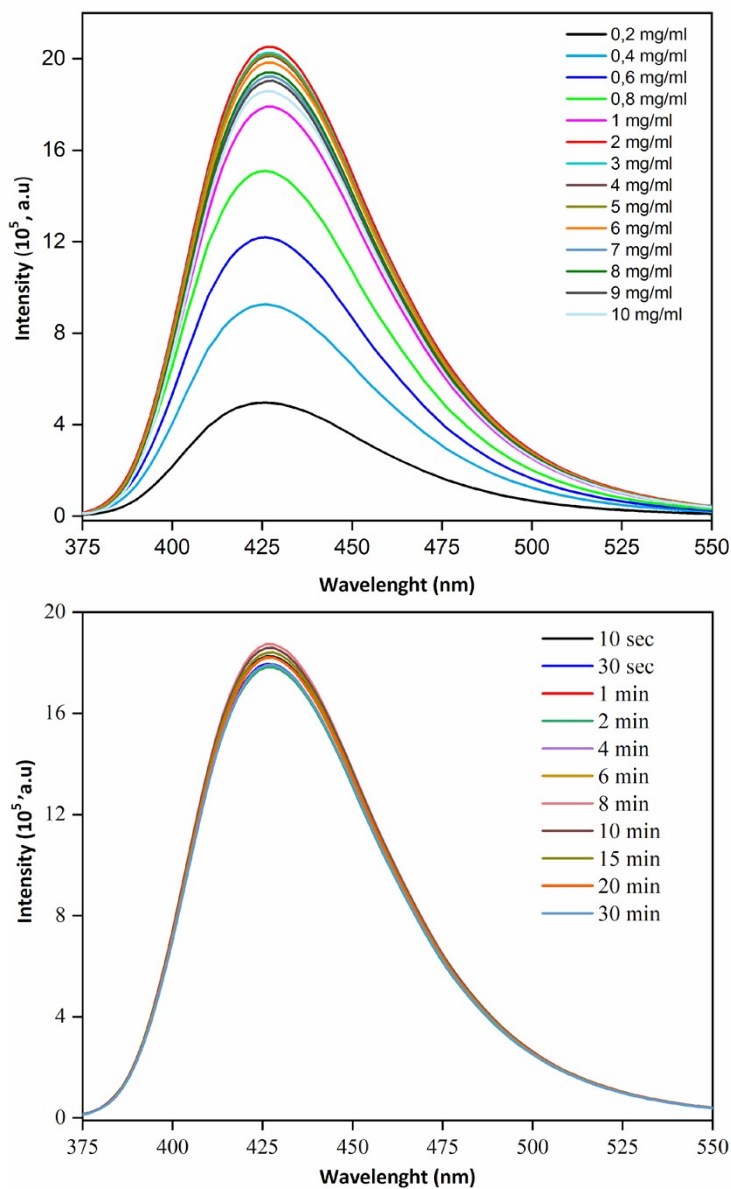

Figure S1. Optimization of concentration (a), and time detection of UiO-66-NH<sub>2</sub>@Hst (AA) in the presence of fluoride ion (b).

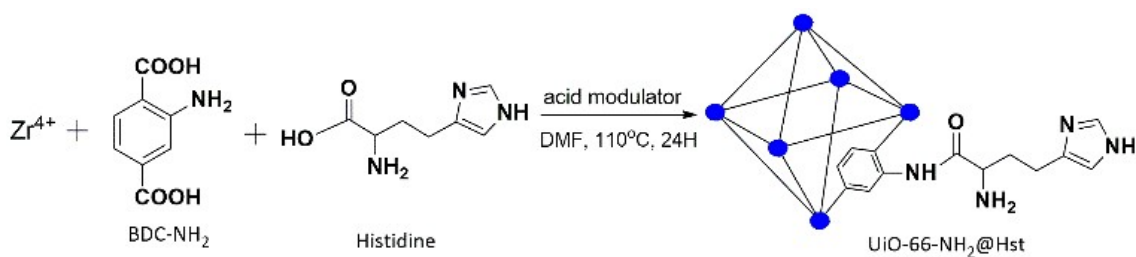

Figure S2. Synthesis schema of UiO-66-NH<sub>2</sub>@Hst with different acid modulators

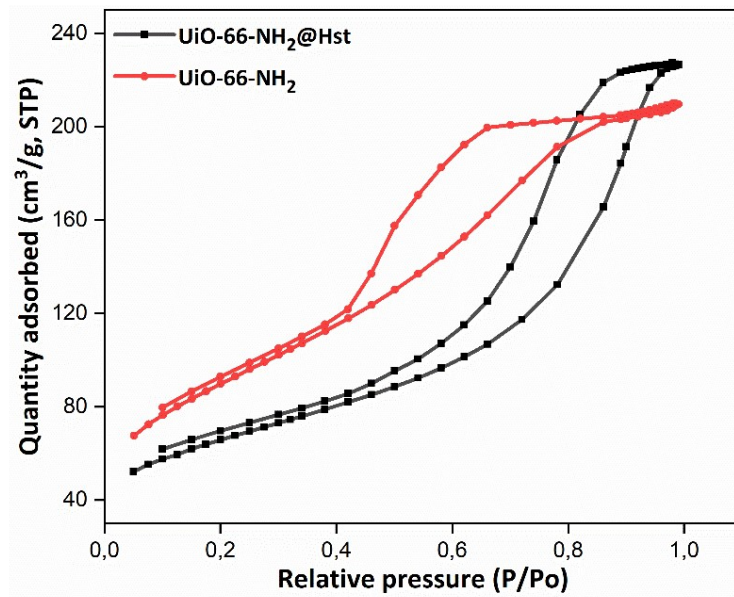

Figure S3. The N<sub>2</sub> adsorption-desorption isotherm of UiO-66-NH<sub>2</sub> and UiO-66-NH<sub>2</sub>@Hst (AA)

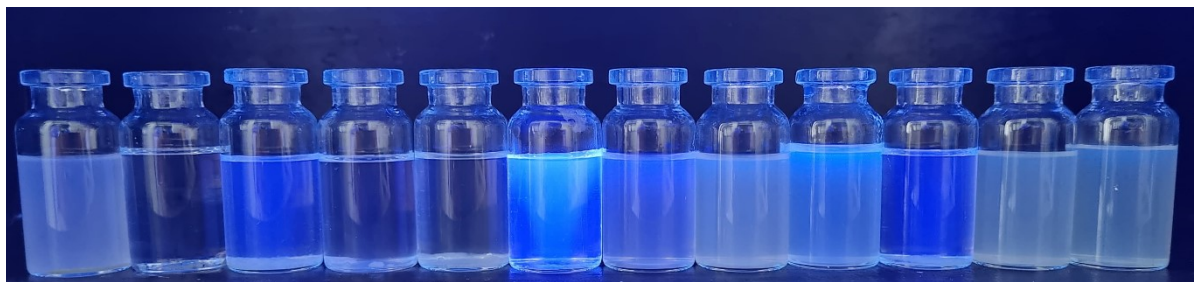

Figure S4. Photoluminescent phenomena under UV light on various solvents
